# Supplementary material for: Investigation of Spatial Distribution of Radiocesium in a Paddy Field as a Potential Sink
Source: PLoS One. 2013 Nov 15;8(11):e80794. doi: 10.1371/journal.pone.0080794 (PMC3829967; doi:10.1371/journal.pone.0080794)
Supplement: Table S1 — Depth distribution of 137Cs concentrations and inventories in soil core samples. (XLSX) [file pone.0080794.s001.xlsx]

## Sheet: Table S1
		Table S1. Depth distribution of 137Cs concentrations and inventories in soil core samples.
		Core name	Depth	Sampling date	Measurement date	Weight	Bulk density	137Cs*			DL	Inventory		Description
			(cm)			(g)	(g/cm3)	(Bq/g)			(Bq/g)	(kBq/m2)	(%)
		MTMC-I	0-2	September 16, 2012	January 5, 2013	23.897	0.608841	4.26788	±	0.31	0.93	51.9692	10.338	Dark gray mud
		(Point I)	2-4		January 5, 2013	23.5038	0.598823	6.58419	±	0.469266	1.4078	78.8553	15.6863	Dark gray mud with humic substances and mica
			4-6		January 5, 2013	29.147	0.742599	1.55885	±	0.10967	0.32901	23.1521	4.60553	Medium sand enriched with humic substances and mica
			6-8		January 5, 2013	34.3019	0.873934	1.7252	±	0.120534	0.361602	30.1542	5.99844	Medium sand enriched with humic substances and mica
			8-10		January 5, 2013	42.7671	1.08961	2.82591	±	0.194096	0.582287	61.5827	12.2503	Dark gray mud with humic substances and mica
			10-12		January 5, 2013	41.764	1.06405	2.78669	±	0.199433	0.598298	59.3036	11.797	Dark gray mud with mica
			12-14		January 5, 2013	46.0222	1.17254	2.18449	±	0.160984	0.482952	51.228	10.1905	Dark gray mud with mica
			14-16		January 5, 2013	44.1566	1.12501	1.96955	±	0.146795	0.440386	44.3152	8.81542	Dark gray mud with mica
			16-18		January 5, 2013	45.6875	1.16401	2.23924	±	0.136571	0.409713	52.1301	10.37	Dark gray mud with mica
			18-20		January 5, 2013	48.0717	1.22476	1.6163	±	0.118231	0.354692	39.5914	7.87573	Dark gray mud with mica and granules
			20-22		January 5, 2013	49.2505	1.25479	0.415192	±	0.0300422	0.0901266	10.4196	2.07272	Dark gray mud with mica
			22-24		January 11, 2013			ND			0.002			Mica-rich dark gray mud
			24-26											Mica-rich dark gray mud
			26-28		January 19, 2013			ND			0.001			Mica-rich dark gray mud
			28-30											Dark gray mud enriched with mica and granules
			Total									502.701	100
		MTMC-C	0-2	September 16, 2012	January 5, 2013	23.0809	0.588048	5.4936	±	0.395162	1.18549	64.6101	26.066	Dark gray mud enriched with humic substances and mica
		(Point C)	2-4		January 5, 2013	22.4842	0.572846	1.81931	±	0.130577	0.391731	20.8437	8.40909	Medium sand enriched with humic substances and mica
			4-6		January 5, 2013	35.3356	0.90027	2.53608	±	0.172759	0.518278	45.6632	18.4221	Dark gray mud with mica and coarse sand
			6-8		January 5, 2013	36.7137	0.935381	2.22984	±	0.152121	0.456363	41.715	16.8293	Humic subsutance rich dark gray mud with mica and granules
			8-10		January 5, 2013	46.6993	1.18979	0.843025	±	0.060999	0.182997	20.0605	8.09311	Dark gray mud with mica and granules
			10-12		January 5, 2013	34.6789	0.883539	1.29803	±	0.0910284	0.273085	22.9373	9.25372	Dark gray mud with mica and granules
			12-14		January 5, 2013	48.6055	1.23836	1.29371	±	0.0907249	0.272175	32.0414	12.9266	Dark gray mud with mica and granules
			14-16		January 15, 2013			ND			0.002			Dark gray mud with mica and granules
			16-18		January 15, 2013			ND			0.003			Dark gray mud with mica and granules
			18-20											Dark gray mud with mica and granules
			20-22		January 14, 2013			ND			0.002			Mica-rich dark gray mud
			22-24											Mica-rich dark gray mud
			24-26		January 14, 2013			ND			0.002			Mica-rich dark gray mud
			Total									247.871	100
		MTMC-O	0-2	September 16, 2012	January 5, 2013	30.1511	0.768181	3.76388	±	0.280829	0.842487	57.8268	19.7401	Dark grey mud and medium sand enriched with humic substances and mica
		(Point O)	2-4		January 5, 2013	32.0085	0.815503	2.27557	±	0.164178	0.492534	37.1147	12.6697	Medium sand enriched with humic substances and mica
			4-6		January 5, 2013	41.6645	1.06152	2.5929	±	0.182014	0.546041	55.048	18.7915	Dark gray mud with humic substances and mica
			6-8		January 5, 2013	39.8076	1.01421	2.38415	±	0.167783	0.503348	48.3603	16.5086	Dark gray mud with mica and granules
			8-10		January 5, 2013	46.4969	1.18463	2.24563	±	0.160441	0.481322	53.2051	18.1624	Dark gray mud with mica and granules
			10-12		January 5, 2013	50.1649	1.27809	1.13519	±	0.0798568	0.23957	29.0175	9.90557	Dark gray mud with mica and granules
			12-14		January 5, 2013	53.6063	1.36577	0.452802	±	0.0326689	0.0980066	12.3684	4.22216	Dark gray mud with mica and granules
			14-16											Dark gray mud with mica and granules
			16-18		January 17, 2013			ND			0.003			Dark gray mud with mica and granules
			18-20											Dark gray mud with mica and granules
			20-22		January 17, 2013			ND			0.002			Dark gray mud with mica and granules
			22-24											Dark gray mud with mica, granules, and pale gray clay patches
			24-26		January 18, 2013			ND			0.002			Dark gray mud with mica, granules, and pale gray clay patches
			26-28											Dark gray mud with mica and granules
			28-30		January 18, 2013			ND			0.002			Dark gray mud with mica and granules
			Total									292.941	100
		ND indicates not detected (or below the detection limit).
		DL is detection limit for each sample
		* Error is one sigma standard deviation from counting statistics
